# Supplementary material
Source: publisher figshare collection journal article supplement (https://acs.figshare.com/ndownloader/files/3874015)
Supplement: Supplementary file 1 [file 3874015]

 
data_yh013

_audit_creation_method           SHELXL-97
_chemical_name_systematic        ?
_chemical_name_common            ?
_chemical_formula_moiety         'C27 H23 N O3'
_chemical_formula_sum            'C27 H23 N O3'
_chemical_melting_point          ?

_exptl_crystal_description       parallelepiped
_exptl_crystal_colour            yellow

_diffrn_ambient_temperature      296(2)
_chemical_formula_weight         409.46

loop_
_atom_type_symbol
_atom_type_description
_atom_type_scat_dispersion_real
_atom_type_scat_dispersion_imag
_atom_type_scat_source
C C 0.0033 0.0016 'International Tables Vol C Tables 4.2.6.8 and 6.1.1.4'
H H 0.0000 0.0000 'International Tables Vol C Tables 4.2.6.8 and 6.1.1.4'
N N 0.0061 0.0033 'International Tables Vol C Tables 4.2.6.8 and 6.1.1.4'
O O 0.0106 0.0060 'International Tables Vol C Tables 4.2.6.8 and 6.1.1.4'

_symmetry_cell_setting           monoclinic
_symmetry_space_group_name_H-M   'P 21/n'
_symmetry_int_tables_number      14
_chemical_absolute_configuration ?

loop_
_symmetry_equiv_pos_as_xyz
'x, y, z'
'-x+1/2, y+1/2, -z+1/2'
'-x, -y, -z'
'x-1/2, -y-1/2, z-1/2'

_cell_length_a                   9.8063(4)
_cell_length_b                   15.3229(5)
_cell_length_c                   14.4437(5)
_cell_angle_alpha                90.00
_cell_angle_beta                 99.159(2)
_cell_angle_gamma                90.00
_cell_volume                     2142.65(13)
_cell_formula_units_Z            4
_cell_measurement_temperature    296(2)
_cell_measurement_reflns_used    ?
_cell_measurement_theta_min      ?
_cell_measurement_theta_max      ?
_exptl_crystal_size_max          0.49
_exptl_crystal_size_mid          0.46
_exptl_crystal_size_min          0.38
_exptl_crystal_density_meas      ?
_exptl_crystal_density_diffrn    1.269
_exptl_crystal_density_method    'not measured'
_exptl_crystal_F_000             864
_exptl_absorpt_coefficient_mu    0.083
_exptl_absorpt_correction_type   multi-scan
_exptl_absorpt_correction_T_min  0.9607
_exptl_absorpt_correction_T_max  0.9693
_exptl_absorpt_process_details   'SADABS V2008/1 (Bruker AXS Inc.)'

_exptl_special_details           
; 
 ? 
;
_diffrn_radiation_probe          x-ray
_diffrn_radiation_type           MoK\a
_diffrn_radiation_wavelength     0.71073
_diffrn_source                   'fine-focus sealed tube'
_diffrn_radiation_monochromator  graphite
_diffrn_measurement_device_type  'Bruker APEX-II CCD'
_diffrn_measurement_method       '\f and \w scans'
_diffrn_detector_area_resol_mean ?
_diffrn_reflns_number            17763
_diffrn_reflns_av_R_equivalents  0.0337
_diffrn_reflns_av_sigmaI/netI    0.0305
_diffrn_reflns_limit_h_min       -12
_diffrn_reflns_limit_h_max       11
_diffrn_reflns_limit_k_min       -19
_diffrn_reflns_limit_k_max       19
_diffrn_reflns_limit_l_min       -18
_diffrn_reflns_limit_l_max       18
_diffrn_reflns_theta_min         2.35
_diffrn_reflns_theta_max         26.46
_reflns_number_total             4376
_reflns_number_gt                2928
_reflns_threshold_expression     >2sigma(I)

_computing_data_collection       'Bruker APEX2'
_computing_cell_refinement       'Bruker SAINT'
_computing_data_reduction        'Bruker SAINT'
_computing_structure_solution    'SHELXS-97 (Sheldrick, 2008)'
_computing_structure_refinement  'SHELXL-97 (Sheldrick, 2008)'
_computing_molecular_graphics    'Bruker SHELXTL'
_computing_publication_material  'Bruker SHELXTL'

_refine_special_details          
; 
 Refinement of F^2^ against ALL reflections.  The weighted R-factor wR and 
 goodness of fit S are based on F^2^, conventional R-factors R are based 
 on F, with F set to zero for negative F^2^. The threshold expression of 
 F^2^ > 2sigma(F^2^) is used only for calculating R-factors(gt) etc. and is 
 not relevant to the choice of reflections for refinement.  R-factors based 
 on F^2^ are statistically about twice as large as those based on F, and R- 
 factors based on ALL data will be even larger. 
;

_refine_ls_structure_factor_coef Fsqd
_refine_ls_matrix_type           full
_refine_ls_weighting_scheme      calc
_refine_ls_weighting_details     
'calc w=1/[\s^2^(Fo^2^)+(0.0840P)^2^+0.5974P] where P=(Fo^2^+2Fc^2^)/3'
_atom_sites_solution_primary     direct
_atom_sites_solution_secondary   difmap
_atom_sites_solution_hydrogens   geom
_refine_ls_hydrogen_treatment    constr
_refine_ls_extinction_method     none
_refine_ls_extinction_coef       ?
_refine_ls_number_reflns         4376
_refine_ls_number_parameters     280
_refine_ls_number_restraints     1
_refine_ls_R_factor_all          0.0879
_refine_ls_R_factor_gt           0.0535
_refine_ls_wR_factor_ref         0.1735
_refine_ls_wR_factor_gt          0.1425
_refine_ls_goodness_of_fit_ref   1.052
_refine_ls_restrained_S_all      1.052
_refine_ls_shift/su_max          0.000
_refine_ls_shift/su_mean         0.000

loop_
_atom_site_label
_atom_site_type_symbol
_atom_site_fract_x
_atom_site_fract_y
_atom_site_fract_z
_atom_site_U_iso_or_equiv
_atom_site_adp_type
_atom_site_occupancy
_atom_site_symmetry_multiplicity
_atom_site_calc_flag
_atom_site_refinement_flags
_atom_site_disorder_assembly
_atom_site_disorder_group
O1 O 0.44620(19) 0.14222(10) -0.03760(10) 0.0664(5) Uani 1 1 d . . .
O2 O 0.41495(15) 0.16846(10) 0.24166(9) 0.0540(4) Uani 1 1 d U . .
O3 O 0.5919(2) 0.25196(11) -0.03066(11) 0.0778(6) Uani 1 1 d . . .
N1 N 0.52291(18) 0.21745(13) 0.39130(11) 0.0528(5) Uani 1 1 d . . .
C1 C 0.3658(3) 0.08637(13) 0.00454(15) 0.0571(6) Uani 1 1 d . . .
C2 C 0.2948(3) 0.02257(17) -0.05188(19) 0.0818(8) Uani 1 1 d . . .
H2A H 0.3025 0.0188 -0.1151 0.098 Uiso 1 1 calc R . .
C3 C 0.2134(4) -0.03463(19) -0.0130(2) 0.0971(10) Uani 1 1 d . . .
H3A H 0.1663 -0.0782 -0.0499 0.117 Uiso 1 1 calc R . .
C4 C 0.2001(3) -0.02875(18) 0.0800(2) 0.0921(10) Uani 1 1 d . . .
H4A H 0.1433 -0.0678 0.1053 0.110 Uiso 1 1 calc R . .
C5 C 0.2704(3) 0.03464(15) 0.13619(19) 0.0689(7) Uani 1 1 d . . .
H5A H 0.2615 0.0380 0.1992 0.083 Uiso 1 1 calc R . .
C6 C 0.3549(2) 0.09362(13) 0.09875(14) 0.0507(5) Uani 1 1 d . . .
C7 C 0.4301(2) 0.16381(12) 0.15114(13) 0.0439(5) Uani 1 1 d . . .
C8 C 0.5090(2) 0.21932(12) 0.10924(13) 0.0430(5) Uani 1 1 d . . .
C9 C 0.5212(3) 0.20824(13) 0.01223(14) 0.0551(6) Uani 1 1 d . . .
C10 C 0.5860(2) 0.29421(12) 0.16030(13) 0.0440(5) Uani 1 1 d . . .
H10A H 0.6777 0.2973 0.1417 0.053 Uiso 1 1 calc R . .
C11 C 0.6046(2) 0.27736(13) 0.26608(13) 0.0466(5) Uani 1 1 d . . .
H11A H 0.6312 0.3325 0.2982 0.056 Uiso 1 1 calc R . .
C12 C 0.4756(2) 0.24486(14) 0.29945(13) 0.0480(5) Uani 1 1 d U . .
H12A H 0.4076 0.2919 0.2985 0.058 Uiso 1 1 calc R . .
C13 C 0.6584(2) 0.17626(17) 0.39431(15) 0.0632(6) Uani 1 1 d . . .
H13A H 0.6502 0.1132 0.3941 0.076 Uiso 1 1 calc R . .
H13B H 0.7210 0.1940 0.4500 0.076 Uiso 1 1 calc R . .
C14 C 0.7099(2) 0.20815(16) 0.30570(15) 0.0575(6) Uani 1 1 d . . .
H14A H 0.8017 0.2331 0.3207 0.069 Uiso 1 1 calc R . .
H14B H 0.7122 0.1608 0.2614 0.069 Uiso 1 1 calc R . .
C15 C 0.5145(2) 0.38157(12) 0.13830(12) 0.0421(5) Uani 1 1 d . . .
C16 C 0.3726(2) 0.39052(13) 0.12484(14) 0.0498(5) Uani 1 1 d . . .
H16A H 0.3175 0.3412 0.1253 0.060 Uiso 1 1 calc R . .
C17 C 0.3113(2) 0.47151(14) 0.11075(16) 0.0590(6) Uani 1 1 d . . .
H17A H 0.2156 0.4763 0.1023 0.071 Uiso 1 1 calc R . .
C18 C 0.3905(3) 0.54466(14) 0.10917(18) 0.0654(6) Uani 1 1 d . . .
H18A H 0.3489 0.5992 0.0994 0.078 Uiso 1 1 calc R . .
C19 C 0.5304(3) 0.53729(15) 0.1219(2) 0.0744(8) Uani 1 1 d . . .
H19A H 0.5845 0.5870 0.1207 0.089 Uiso 1 1 calc R . .
C20 C 0.5928(2) 0.45651(14) 0.13665(18) 0.0619(6) Uani 1 1 d . . .
H20A H 0.6887 0.4525 0.1456 0.074 Uiso 1 1 calc R . .
C21 C 0.4275(2) 0.17752(17) 0.44348(14) 0.0590(6) Uani 1 1 d . . .
H21A H 0.4159 0.1167 0.4253 0.071 Uiso 1 1 calc R . .
H21B H 0.3384 0.2059 0.4278 0.071 Uiso 1 1 calc R . .
C22 C 0.4738(2) 0.18273(15) 0.54855(14) 0.0504(5) Uani 1 1 d . . .
C23 C 0.4574(2) 0.11099(18) 0.60213(17) 0.0677(7) Uani 1 1 d . . .
H23A H 0.4214 0.0597 0.5736 0.081 Uiso 1 1 calc R . .
C24 C 0.4942(3) 0.1144(3) 0.6989(2) 0.1011(12) Uani 1 1 d . . .
H24A H 0.4823 0.0657 0.7353 0.121 Uiso 1 1 calc R . .
C25 C 0.5479(3) 0.1897(4) 0.74035(19) 0.1113(15) Uani 1 1 d . . .
H25A H 0.5724 0.1926 0.8052 0.134 Uiso 1 1 calc R . .
C26 C 0.5654(3) 0.2605(3) 0.6865(2) 0.0985(11) Uani 1 1 d . . .
H26A H 0.6027 0.3116 0.7149 0.118 Uiso 1 1 calc R . .
C27 C 0.5288(3) 0.25737(18) 0.59079(18) 0.0696(7) Uani 1 1 d . . .
H27A H 0.5415 0.3061 0.5547 0.084 Uiso 1 1 calc R . .

loop_
_atom_site_aniso_label
_atom_site_aniso_U_11
_atom_site_aniso_U_22
_atom_site_aniso_U_33
_atom_site_aniso_U_23
_atom_site_aniso_U_13
_atom_site_aniso_U_12
O1 0.0999(13) 0.0584(9) 0.0423(8) -0.0080(7) 0.0152(8) -0.0143(9)
O2 0.0533(9) 0.0718(10) 0.0369(7) 0.0058(6) 0.0077(6) -0.0111(7)
O3 0.1206(16) 0.0718(11) 0.0480(9) -0.0002(8) 0.0347(10) -0.0265(10)
N1 0.0437(10) 0.0801(12) 0.0337(8) 0.0081(8) 0.0034(7) 0.0047(9)
C1 0.0712(15) 0.0450(11) 0.0528(12) -0.0007(10) 0.0023(11) -0.0022(10)
C2 0.107(2) 0.0666(16) 0.0683(16) -0.0137(13) 0.0025(15) -0.0129(16)
C3 0.115(3) 0.0718(18) 0.098(2) -0.0128(17) -0.005(2) -0.0323(18)
C4 0.097(2) 0.0729(18) 0.102(2) 0.0106(17) 0.0042(18) -0.0348(16)
C5 0.0691(16) 0.0655(15) 0.0691(15) 0.0129(12) 0.0016(12) -0.0138(12)
C6 0.0545(13) 0.0446(11) 0.0503(12) 0.0086(9) -0.0004(9) 0.0007(9)
C7 0.0475(11) 0.0482(11) 0.0350(9) 0.0047(8) 0.0035(8) 0.0041(9)
C8 0.0508(12) 0.0427(10) 0.0353(9) 0.0029(8) 0.0064(8) 0.0034(9)
C9 0.0782(16) 0.0472(11) 0.0410(11) 0.0010(9) 0.0128(11) -0.0010(11)
C10 0.0457(11) 0.0488(11) 0.0378(10) 0.0023(8) 0.0077(8) -0.0015(9)
C11 0.0465(12) 0.0545(11) 0.0372(10) 0.0014(9) 0.0020(8) -0.0023(9)
C12 0.0463(12) 0.0606(12) 0.0355(10) 0.0008(8) 0.0015(8) 0.0064(9)
C13 0.0479(13) 0.0866(17) 0.0540(13) 0.0214(12) 0.0045(10) 0.0092(12)
C14 0.0423(12) 0.0781(15) 0.0511(12) 0.0117(11) 0.0045(9) 0.0049(11)
C15 0.0436(11) 0.0463(11) 0.0358(9) 0.0002(8) 0.0046(8) -0.0053(8)
C16 0.0460(12) 0.0487(11) 0.0526(12) 0.0071(9) 0.0019(9) -0.0110(9)
C17 0.0461(13) 0.0578(13) 0.0725(15) 0.0091(11) 0.0075(11) 0.0007(10)
C18 0.0635(16) 0.0461(12) 0.0866(17) 0.0049(11) 0.0124(13) 0.0030(11)
C19 0.0621(16) 0.0465(13) 0.114(2) 0.0000(13) 0.0135(15) -0.0160(11)
C20 0.0431(12) 0.0554(13) 0.0868(17) 0.0023(12) 0.0095(11) -0.0099(10)
C21 0.0537(13) 0.0811(15) 0.0419(11) 0.0029(11) 0.0062(10) -0.0075(11)
C22 0.0404(11) 0.0743(14) 0.0382(10) 0.0037(10) 0.0112(8) 0.0067(10)
C23 0.0581(15) 0.0851(17) 0.0631(15) 0.0163(13) 0.0191(11) 0.0033(13)
C24 0.0663(19) 0.170(4) 0.071(2) 0.061(2) 0.0240(16) 0.019(2)
C25 0.0580(18) 0.241(5) 0.0364(14) -0.003(2) 0.0119(12) 0.017(2)
C26 0.073(2) 0.149(3) 0.073(2) -0.046(2) 0.0110(16) 0.001(2)
C27 0.0683(16) 0.0795(17) 0.0600(15) -0.0077(13) 0.0068(12) 0.0025(13)

_geom_special_details            
; 
 All esds (except the esd in the dihedral angle between two l.s. planes) 
 are estimated using the full covariance matrix.  The cell esds are taken 
 into account individually in the estimation of esds in distances, angles 
 and torsion angles; correlations between esds in cell parameters are only 
 used when they are defined by crystal symmetry.  An approximate (isotropic) 
 treatment of cell esds is used for estimating esds involving l.s. planes. 
;

loop_
_geom_bond_atom_site_label_1
_geom_bond_atom_site_label_2
_geom_bond_distance
_geom_bond_site_symmetry_2
_geom_bond_publ_flag
O1 C1 1.370(3) . ?
O1 C9 1.383(3) . ?
O2 C7 1.341(2) . ?
O2 C12 1.504(2) . ?
O3 C9 1.204(3) . ?
N1 C12 1.399(2) . ?
N1 C21 1.429(3) . ?
N1 C13 1.465(3) . ?
C1 C6 1.386(3) . ?
C1 C2 1.387(3) . ?
C2 C3 1.365(4) . ?
C2 H2A 0.9300 . ?
C3 C4 1.373(4) . ?
C3 H3A 0.9300 . ?
C4 C5 1.378(4) . ?
C4 H4A 0.9300 . ?
C5 C6 1.392(3) . ?
C5 H5A 0.9300 . ?
C6 C7 1.448(3) . ?
C7 C8 1.355(3) . ?
C8 C9 1.435(3) . ?
C8 C10 1.501(3) . ?
C10 C15 1.521(3) . ?
C10 C11 1.532(3) . ?
C10 H10A 0.9800 . ?
C11 C12 1.508(3) . ?
C11 C14 1.527(3) . ?
C11 H11A 0.9800 . ?
C12 H12A 0.9800 . ?
C13 C14 1.529(3) . ?
C13 H13A 0.9700 . ?
C13 H13B 0.9700 . ?
C14 H14A 0.9700 . ?
C14 H14B 0.9700 . ?
C15 C16 1.380(3) . ?
C15 C20 1.384(3) . ?
C16 C17 1.380(3) . ?
C16 H16A 0.9300 . ?
C17 C18 1.366(3) . ?
C17 H17A 0.9300 . ?
C18 C19 1.360(4) . ?
C18 H18A 0.9300 . ?
C19 C20 1.382(3) . ?
C19 H19A 0.9300 . ?
C20 H20A 0.9300 . ?
C21 C22 1.515(3) . ?
C21 H21A 0.9700 . ?
C21 H21B 0.9700 . ?
C22 C27 1.366(3) . ?
C22 C23 1.369(3) . ?
C23 C24 1.388(4) . ?
C23 H23A 0.9300 . ?
C24 C25 1.367(5) . ?
C24 H24A 0.9300 . ?
C25 C26 1.362(5) . ?
C25 H25A 0.9300 . ?
C26 C27 1.373(4) . ?
C26 H26A 0.9300 . ?
C27 H27A 0.9300 . ?

loop_
_geom_angle_atom_site_label_1
_geom_angle_atom_site_label_2
_geom_angle_atom_site_label_3
_geom_angle
_geom_angle_site_symmetry_1
_geom_angle_site_symmetry_3
_geom_angle_publ_flag
C1 O1 C9 121.42(16) . . ?
C7 O2 C12 119.14(15) . . ?
C12 N1 C21 118.84(17) . . ?
C12 N1 C13 108.67(16) . . ?
C21 N1 C13 117.82(18) . . ?
O1 C1 C6 121.71(19) . . ?
O1 C1 C2 116.7(2) . . ?
C6 C1 C2 121.6(2) . . ?
C3 C2 C1 118.8(3) . . ?
C3 C2 H2A 120.6 . . ?
C1 C2 H2A 120.6 . . ?
C2 C3 C4 120.9(3) . . ?
C2 C3 H3A 119.6 . . ?
C4 C3 H3A 119.6 . . ?
C3 C4 C5 120.4(3) . . ?
C3 C4 H4A 119.8 . . ?
C5 C4 H4A 119.8 . . ?
C4 C5 C6 120.1(3) . . ?
C4 C5 H5A 119.9 . . ?
C6 C5 H5A 119.9 . . ?
C1 C6 C5 118.2(2) . . ?
C1 C6 C7 117.40(18) . . ?
C5 C6 C7 124.4(2) . . ?
O2 C7 C8 124.18(18) . . ?
O2 C7 C6 115.00(17) . . ?
C8 C7 C6 120.82(18) . . ?
C7 C8 C9 120.26(18) . . ?
C7 C8 C10 122.60(17) . . ?
C9 C8 C10 117.14(17) . . ?
O3 C9 O1 116.17(18) . . ?
O3 C9 C8 125.5(2) . . ?
O1 C9 C8 118.33(18) . . ?
C8 C10 C15 112.99(16) . . ?
C8 C10 C11 109.37(15) . . ?
C15 C10 C11 109.53(15) . . ?
C8 C10 H10A 108.3 . . ?
C15 C10 H10A 108.3 . . ?
C11 C10 H10A 108.3 . . ?
C12 C11 C14 101.71(16) . . ?
C12 C11 C10 113.71(16) . . ?
C14 C11 C10 117.17(17) . . ?
C12 C11 H11A 107.9 . . ?
C14 C11 H11A 107.9 . . ?
C10 C11 H11A 107.9 . . ?
N1 C12 O2 109.56(17) . . ?
N1 C12 C11 103.51(16) . . ?
O2 C12 C11 110.93(15) . . ?
N1 C12 H12A 110.9 . . ?
O2 C12 H12A 110.9 . . ?
C11 C12 H12A 110.9 . . ?
N1 C13 C14 104.85(17) . . ?
N1 C13 H13A 110.8 . . ?
C14 C13 H13A 110.8 . . ?
N1 C13 H13B 110.8 . . ?
C14 C13 H13B 110.8 . . ?
H13A C13 H13B 108.9 . . ?
C11 C14 C13 103.98(17) . . ?
C11 C14 H14A 111.0 . . ?
C13 C14 H14A 111.0 . . ?
C11 C14 H14B 111.0 . . ?
C13 C14 H14B 111.0 . . ?
H14A C14 H14B 109.0 . . ?
C16 C15 C20 117.72(19) . . ?
C16 C15 C10 122.54(17) . . ?
C20 C15 C10 119.64(18) . . ?
C17 C16 C15 121.07(19) . . ?
C17 C16 H16A 119.5 . . ?
C15 C16 H16A 119.5 . . ?
C18 C17 C16 120.3(2) . . ?
C18 C17 H17A 119.8 . . ?
C16 C17 H17A 119.8 . . ?
C19 C18 C17 119.6(2) . . ?
C19 C18 H18A 120.2 . . ?
C17 C18 H18A 120.2 . . ?
C18 C19 C20 120.5(2) . . ?
C18 C19 H19A 119.7 . . ?
C20 C19 H19A 119.7 . . ?
C19 C20 C15 120.8(2) . . ?
C19 C20 H20A 119.6 . . ?
C15 C20 H20A 119.6 . . ?
N1 C21 C22 112.85(18) . . ?
N1 C21 H21A 109.0 . . ?
C22 C21 H21A 109.0 . . ?
N1 C21 H21B 109.0 . . ?
C22 C21 H21B 109.0 . . ?
H21A C21 H21B 107.8 . . ?
C27 C22 C23 119.6(2) . . ?
C27 C22 C21 121.7(2) . . ?
C23 C22 C21 118.7(2) . . ?
C22 C23 C24 120.3(3) . . ?
C22 C23 H23A 119.9 . . ?
C24 C23 H23A 119.9 . . ?
C25 C24 C23 119.5(3) . . ?
C25 C24 H24A 120.2 . . ?
C23 C24 H24A 120.2 . . ?
C26 C25 C24 119.9(3) . . ?
C26 C25 H25A 120.1 . . ?
C24 C25 H25A 120.1 . . ?
C25 C26 C27 120.7(3) . . ?
C25 C26 H26A 119.7 . . ?
C27 C26 H26A 119.7 . . ?
C22 C27 C26 120.0(3) . . ?
C22 C27 H27A 120.0 . . ?
C26 C27 H27A 120.0 . . ?

loop_
_geom_torsion_atom_site_label_1
_geom_torsion_atom_site_label_2
_geom_torsion_atom_site_label_3
_geom_torsion_atom_site_label_4
_geom_torsion
_geom_torsion_site_symmetry_1
_geom_torsion_site_symmetry_2
_geom_torsion_site_symmetry_3
_geom_torsion_site_symmetry_4
_geom_torsion_publ_flag
C9 O1 C1 C6 0.4(3) . . . . ?
C9 O1 C1 C2 179.9(2) . . . . ?
O1 C1 C2 C3 179.9(3) . . . . ?
C6 C1 C2 C3 -0.5(4) . . . . ?
C1 C2 C3 C4 0.9(5) . . . . ?
C2 C3 C4 C5 -0.8(5) . . . . ?
C3 C4 C5 C6 0.4(5) . . . . ?
O1 C1 C6 C5 179.6(2) . . . . ?
C2 C1 C6 C5 0.1(4) . . . . ?
O1 C1 C6 C7 1.1(3) . . . . ?
C2 C1 C6 C7 -178.4(2) . . . . ?
C4 C5 C6 C1 -0.1(4) . . . . ?
C4 C5 C6 C7 178.3(2) . . . . ?
C12 O2 C7 C8 6.9(3) . . . . ?
C12 O2 C7 C6 -173.14(16) . . . . ?
C1 C6 C7 O2 179.31(18) . . . . ?
C5 C6 C7 O2 0.9(3) . . . . ?
C1 C6 C7 C8 -0.7(3) . . . . ?
C5 C6 C7 C8 -179.1(2) . . . . ?
O2 C7 C8 C9 178.80(19) . . . . ?
C6 C7 C8 C9 -1.2(3) . . . . ?
O2 C7 C8 C10 -1.5(3) . . . . ?
C6 C7 C8 C10 178.54(18) . . . . ?
C1 O1 C9 O3 177.7(2) . . . . ?
C1 O1 C9 C8 -2.3(3) . . . . ?
C7 C8 C9 O3 -177.3(2) . . . . ?
C10 C8 C9 O3 2.9(3) . . . . ?
C7 C8 C9 O1 2.7(3) . . . . ?
C10 C8 C9 O1 -177.08(18) . . . . ?
C7 C8 C10 C15 -101.8(2) . . . . ?
C9 C8 C10 C15 78.0(2) . . . . ?
C7 C8 C10 C11 20.5(3) . . . . ?
C9 C8 C10 C11 -159.75(18) . . . . ?
C8 C10 C11 C12 -45.0(2) . . . . ?
C15 C10 C11 C12 79.3(2) . . . . ?
C8 C10 C11 C14 73.3(2) . . . . ?
C15 C10 C11 C14 -162.33(17) . . . . ?
C21 N1 C12 O2 -58.1(2) . . . . ?
C13 N1 C12 O2 80.4(2) . . . . ?
C21 N1 C12 C11 -176.48(19) . . . . ?
C13 N1 C12 C11 -38.0(2) . . . . ?
C7 O2 C12 N1 -145.00(17) . . . . ?
C7 O2 C12 C11 -31.3(2) . . . . ?
C14 C11 C12 N1 41.4(2) . . . . ?
C10 C11 C12 N1 168.30(17) . . . . ?
C14 C11 C12 O2 -76.02(18) . . . . ?
C10 C11 C12 O2 50.9(2) . . . . ?
C12 N1 C13 C14 18.6(3) . . . . ?
C21 N1 C13 C14 157.52(19) . . . . ?
C12 C11 C14 C13 -29.4(2) . . . . ?
C10 C11 C14 C13 -154.02(19) . . . . ?
N1 C13 C14 C11 8.1(2) . . . . ?
C8 C10 C15 C16 36.9(2) . . . . ?
C11 C10 C15 C16 -85.3(2) . . . . ?
C8 C10 C15 C20 -146.86(19) . . . . ?
C11 C10 C15 C20 91.0(2) . . . . ?
C20 C15 C16 C17 -0.3(3) . . . . ?
C10 C15 C16 C17 175.94(19) . . . . ?
C15 C16 C17 C18 0.5(4) . . . . ?
C16 C17 C18 C19 -0.2(4) . . . . ?
C17 C18 C19 C20 -0.1(4) . . . . ?
C18 C19 C20 C15 0.3(4) . . . . ?
C16 C15 C20 C19 0.0(3) . . . . ?
C10 C15 C20 C19 -176.4(2) . . . . ?
C12 N1 C21 C22 -157.96(19) . . . . ?
C13 N1 C21 C22 67.3(3) . . . . ?
N1 C21 C22 C27 43.1(3) . . . . ?
N1 C21 C22 C23 -138.1(2) . . . . ?
C27 C22 C23 C24 1.1(4) . . . . ?
C21 C22 C23 C24 -177.7(2) . . . . ?
C22 C23 C24 C25 -0.4(4) . . . . ?
C23 C24 C25 C26 -0.3(5) . . . . ?
C24 C25 C26 C27 0.5(5) . . . . ?
C23 C22 C27 C26 -0.9(4) . . . . ?
C21 C22 C27 C26 177.9(2) . . . . ?
C25 C26 C27 C22 0.1(4) . . . . ?

_diffrn_measured_fraction_theta_max 0.990
_diffrn_reflns_theta_full        26.46
_diffrn_measured_fraction_theta_full 0.990
_refine_diff_density_max         0.290
_refine_diff_density_min         -0.197
_refine_diff_density_rms         0.049
